# Supplementary material for: Evaluation of the relative importance of Ti–Cl⋯H–N hydrogen bonds and supramolecular interactions between perfluorophenyl rings in the crystal structures of [Ti(NR)Cl2(NHMe2)2] (R = iPr, C6H5 or C6F5)Electronic supplementary information (ESI) available: characterisation and crystal data for compounds 1–3. See http://www.rsc.org/suppdata/cc/b1/b109251k/
Source: Royal Society of Chemistry journal article supplement (doi:10.1039/b109251k), 2001-12-06
Supplement: b109251k(2).doc [file b109251k%282%29.doc]

A full listing of intramolecular distances and angles has been deposited in CIF format. *Crystal data for* **1**: C7H21Cl2N3Ti, *M* = 266.07, monoclinic, *C*2/c, *a* = 16.913(1), *b* = 9.101(1), *c* = 12.044(1) Å,  = 128.78(5) o, *U* = 1445.1(1) Å3, *Z* = 4, *T* = 175 K,  = 0.93 mm-1, 1374 independent reflections (*R*merge = 0.010), 1078 *I*>3(*I*) used in refinement, final *R* indices: *R* = 0.0264, *R*w = 0.0333; *for* **2**: C10H19Cl2N3Ti, *M* = 300.08, monoclinic, *C*2/c, *a* = 16.260(1), *b* = 10.303(1), *c* = 11.935(1) Å,  = 131.01(1) o, *U* = 1508.8(1) Å3, *Z* = 4, *T* = 150 K,  = 0.90 mm-1, 1799 indpendent reflections (*R*merge = 0.017), 1583 *I*>3(*I*) used in refinement, final *R* indices: *R* = 0.0250, *R*w = 0.0307; *for* **3**: C10H14Cl2F5N3Ti, *M* = 390.04, monoclinic, *C*2/c, *a* = 15.696(3), *b* = 15.569(1), *c* = 6.7371(9) Å,  = 109.69(2) o, *U* = 1550.1(3) Å3, *Z* = 4,  = 8.33 mm-1, 1581 independent reflections (*R*merge = 0.080), 1536 *I*>3(*I*) used in refinement, final *R* indices: *R* = 0.0615, *R*w = 0.0648.
