# Supplementary material for: Evaluation of the relative importance of Ti–Cl⋯H–N hydrogen bonds and supramolecular interactions between perfluorophenyl rings in the crystal structures of [Ti(NR)Cl2(NHMe2)2] (R = iPr, C6H5 or C6F5)Electronic supplementary information (ESI) available: characterisation and crystal data for compounds 1–3. See http://www.rsc.org/suppdata/cc/b1/b109251k/
Source: Royal Society of Chemistry journal article supplement (doi:10.1039/b109251k), 2001-12-06
Supplement: b109251k.doc [file b109251k.doc]

**Evaluation of the relative importance of Ti-Cl**···**H-N hydrogen bonds and supramolecular interactions between perfluorophenyl rings in the crystal structures of [Ti(NR)Cl2(NHMe2)2] (R = iPr, C6H5 or C6F5)**

**Nico Adams, Andrew R Cowley, Stuart R. Dubberley, Andrew J. Sealey, Michael E. G. Skinner, and Philip Mountford***

### Inorganic Chemistry Laboratory, University of Oxford, South Parks Road, Oxford OX1 3QR, UK

_______________________________________________________________________________________________

## ELECTRONIC SUPPLEMENTARY INFORMATION

Characterising data for the compounds [Ti(NiPr)Cl2(NHMe2)2] (**1**), [Ti(NC6H5)Cl2(NHMe2)2] (**2**) and [Ti(NC6F5)Cl2(NHMe2)2] (**3**).

**[Ti(NiPr)Cl2(NHMe2)2] (1)**

**1H NMR data** (C6D6, 500.0 MHz, 298 K)

3.29 1 H q 3J = 6.8 Hz CHMe2

2.65 2 H br. sept. 3J = 6.3 Hz NHMe2

2.25 12 H d 3J = 6.3 Hz NHMe2

0.94 6 H d 3J = 6.8 Hz CHMe2

**13C-{1H} NMR data** (125.7 MHz, 298 K, C6D6, 128.0 ppm)

69.1 CHMe2

40.5 NHMe2

25.4 CHMe2

**IR data** (NaCl plates, Nujol, cm-1)

3228 (m), 1402 (w), 1354 (w), 1298 (m), 1258 (m), 1240 (m), 1214 (w), 1146 (w), 1120 (m), 1108 (m), 1062(m), 1018 (m), 900 (m), 800 (w), 722 (m), 634 (m) , 500 (m)

**Elemental analysis for C7H21N3TiCl2**

Found (calculated) % : C 31.4 (31.6); H 7.9 (8.0); N 15.5 (15.8)

**EI mass spectrum:**

*m/z* = 266 [M]+ 7%

**[Ti(NC6H5)Cl2(NHMe2)2] (2)**

**1H NMR data** (C6D6, 500.0 MHz, 298 K)

7.03 2 H app. t 3Japp. = 7.2 Hz *m*-C6H5

6.99 2 H dd 3Jo-m = 8.5 Hz, 4Jo-p = 1.4 Hz *o*-C6H5

6.76 1 H tt 3Jm-p. = 7.2 Hz *p*-C6H5

2.64 2 H br. sept. 3J = 6.1 Hz HNMe2

2.23 12 H d 3J = 6.1 Hz HNMe2

**13C-{1H} NMR data** (C6D6, 125.7 MHz, 298 K)

161.0 *i*- C6H5

128.5 *m*-C6H5

123.7 *o*- C6H5

122.7 p- C6H5

40.4 NHMe2

**IR data** (NaCl plates, Nujol, cm-1)

3220 (w), 1326 (m), 1258 (w), 1210 (w), 1018 (m), 894 (m), 750 (m), 722 (m), 518 (m), 494 (s), 454 (m)

**Elemental analysis for C10H19N3TiCl2**

Found (calculated) % : C 39.7 (40.1); H 7.7 (6.4); N 13.6 (14.0)

**[Ti(NC6F5)Cl2(NHMe2)2] (3)**

**1H NMR data** (C6D6, 300.1 MHz, 298 K)

2.67 2 H br. sept. 3J = 6.1 Hz HNMe2

2.16 12 H d 3J = 6.1 Hz HNMe2

**19F NMR data** (C6D6, 282.2 MHz, 298 K)

-155.28 2 F d 3J = 22.8 Hz *o*- C6F5

-166.01 2 F dt 3J = 22.9 Hz *m*-C6F5

-166.86 1 F t 3J = 21.4 Hz *p*- C6F5

**13C-{1H/19F} NMR data** (75.4 MHz, 298 K, C6D6, 128.0 ppm)

143.2 *m*-C6F5

137.3 *o*-C6F5

136.5 *p*-C6F5

134.0 *i*-C6F5

40.9 NHMe2

**I.R data** (NaCl plates, Nujol, cm-1)

3275 (m), 1612 (m), 1338 (m), 1306 (m), 1249 (m), 1213 (m), 1156 (m), 1111 (m), 992 (m), 982 (m), 720 (s), 449 (m), 406 (m)

**Elemental analysis for C10H12F5N3TiCl2**

Found (calculated) % : C 30.7 (30.8); H 3.7 (3.6); N 10.6 (10.8)

**EI+ mass spectrum:**

*m/z* = 598 [{M - 2 NHMe2}2]+ 45 %

*m/z* = 345 [M - NHMe2]+ 10 %

*m/z* = 298 [M - 2 NHMe2]+ 12%
